# Supplementary material for: Preparedness for injuries sustained while hiking 14,000ft peaks in Colorado
Source: Research Square preprint supplement (doi:10.21203/rs.3.rs-3553945/v1), 2024-10-07
Supplement: Supplementary file 1 [file 196bc42a036c35af9f86ddad.pdf]

## SUPPLEMENTARY MATERIAL

For:

**Injuries Sustained while Hiking 14,000ft Peaks in Colorado**

By:

**Nicole Twardowski, Spencer Cooper, Isain Zapata & David Ross**

Note: Questionnaire was administered originally through Qualtrics XM

1. How many 14ers have you done total? (peaks may be counted more than once)

***Number of 14ers***

2. How many of the 14ers have you done solo (without a partner or group)?

***Number of solo climbs***

3. How many of the 14ers have you done with a partner or a group?

***Number of partner/group climbs***

4. Have you ever been injured while hiking a 14er?

***a. Yes***

***b. No***

5. Please mark any of the injuries you have had (check all that apply)

***a. Blister***

***b. Bruise***

***c. Cut***

***d. Dehydration***

***e. Muscle Strain***

***f. Sunburn***

***g. Broken Bone***

***h. Bug Bite***

***i. Felt Cold***

***j. Felt Hot***

***k. Abdominal Pain***

***l. Nausea / Vomiting***

***m. Diarrhea***

***n. Ligament Tear***

***o. Torn Meniscus***

***p. Dislocation***

***q. Tendon Tear***

***r. Other – Open answer***

6. How many times have you broken a bone while hiking a 14er?

***Number of times***

7. Which bone(s) did you break?

***Open answer***

8. How many 14er peaks had you climbed the first time you broke a bone?

***Number of 14ers***

9. Which ligament did you tear?

***Open answer***

10. Which tendon did you tear?

***Open answer***

11. How many 14er peaks had you climbed the first time you tore a ligament?

***Number of 14ers***

12. How many 14er peaks had you climbed the first time you tore a tendon?

***Number of 14ers***

13. Do you carry any medical supplies when you hike? (check all that apply)

- a. Bandaid***
- b. Bandages***
- c. Sunscreen***
- d. Ace Wrap***
- e. Pain Relievers***
- f. Blister Pad***
- g. Insect Repellent***
- h. Elastic Strap***
- i. Antiseptic Cream***
- j. Tweezers***
- k. Tourniquet***
- l. SAM Splint***
- m. Other – Open answer***

14. Have you ever witnessed someone get seriously hurt while hiking a 14er?

- a. Yes***
- b. No***

15. Have you ever been helped off a 14er by Search and Rescue?

- a. Yes***
- b. No***

16. What was the reason you were helped by Search and Rescue?

***Open answer***

17. Have you ever run out of water while hiking a 14er?

- a. Yes***
- b. No***

18. Have you ever decided to turn back early before summiting a 14er?  
**a. Yes**  
**b. No**
19. If you have turned back early before summiting, what was the cause? (weather, injury, etc.)  
**Open answer**
20. Do you use an app or website to check trail conditions before hiking?  
**a. Yes**  
**b. No**
21. Which app or website do you use to check trail conditions?  
**a. 14ers.com**  
**b. AllTrails**  
**c. Other – Open answer**
22. Do you use an app or website to check the weather forecast prior to hiking?  
**a. Yes**  
**b. No**
23. Which app or website do you use to check the weather prior to hiking?  
**Open answer**
24. Have you ever been lost on a 14er?  
**a. Yes**  
**b. No**
25. Do you use a trail app to help you find the correct route? (Alltrails, 14ers.com, etc.)  
**a. Yes**  
**b. No**
26. Which trail app do you use?  
**Open answer**
27. Have you ever taken an outdoor wilderness preparedness class? (NOLS, BOSS, AIARE, etc.)  
**a. Yes**  
**b. No**
28. How often do you inform someone who is not hiking with you where you are hiking and when to expect you back?  
**a. Always**  
**b. Sometimes**  
**c. Never**
29. What piece of safety advice would you give someone who is hiking their first 14er?  
**Open answer**
